# Supplementary material for: Synthesis of a mesoporous titania thin film with a pseudo-single-crystal framework by liquid-phase epitaxial growth, and enhancement of photocatalytic activity
Source: Royal Society of Chemistry journal article supplement (doi:10.1039/d0ra08019e), 2020-01-01
Supplement: d0ra08019e1.pdf [file d0ra08019e1.pdf]

## Supplementary Information

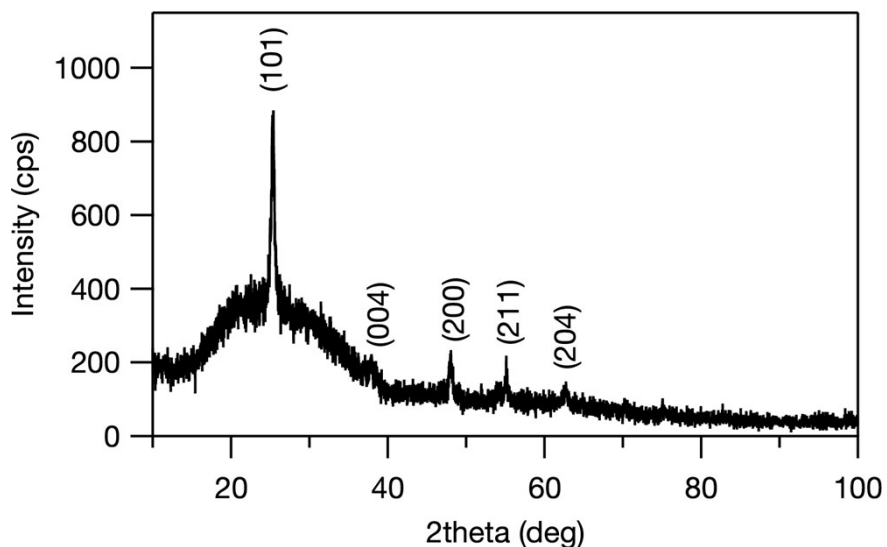

**Figure S1.** Grazing incident XRD pattern of mesoporous  $\text{TiO}_2$  thin film fabricated on glass substrate. Assignments of crystal lattice indices for anatase phase are included.

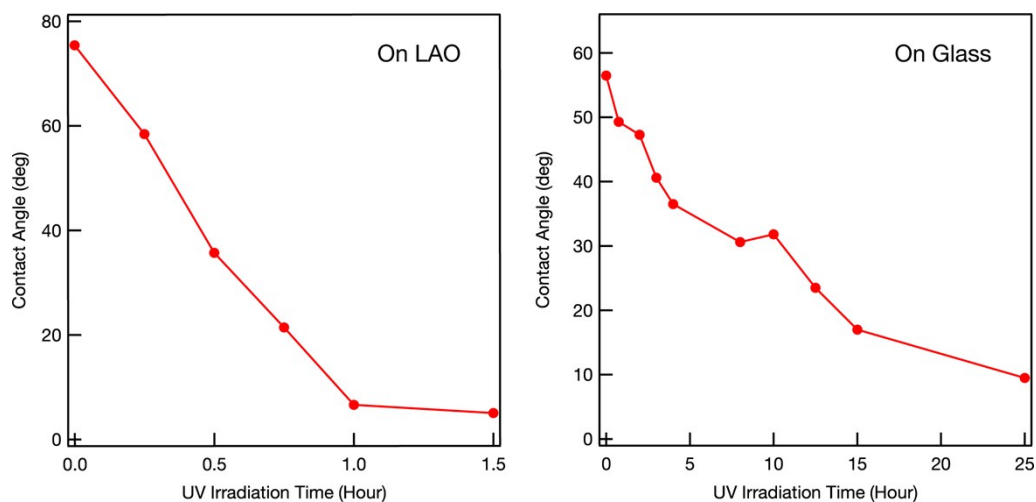

**Figure S2.** Changes in water-contact angle with UV irradiation time for oleic acid-coated mesoporous  $\text{TiO}_2$  thin films fabricated on LAO (001) single-crystal and glass substrates.
